# Supplementary material for: Chronotype is Associated with Sleep Quality in Older Adults
Source: PubMed Central journal article supplement — medRxiv. 2023 Sep 6:2023.09.04.23294997. Preprint. [Version 1] doi: 10.1101/2023.09.04.23294997 (PMC10508806; doi:10.1101/2023.09.04.23294997), 2023-09-06

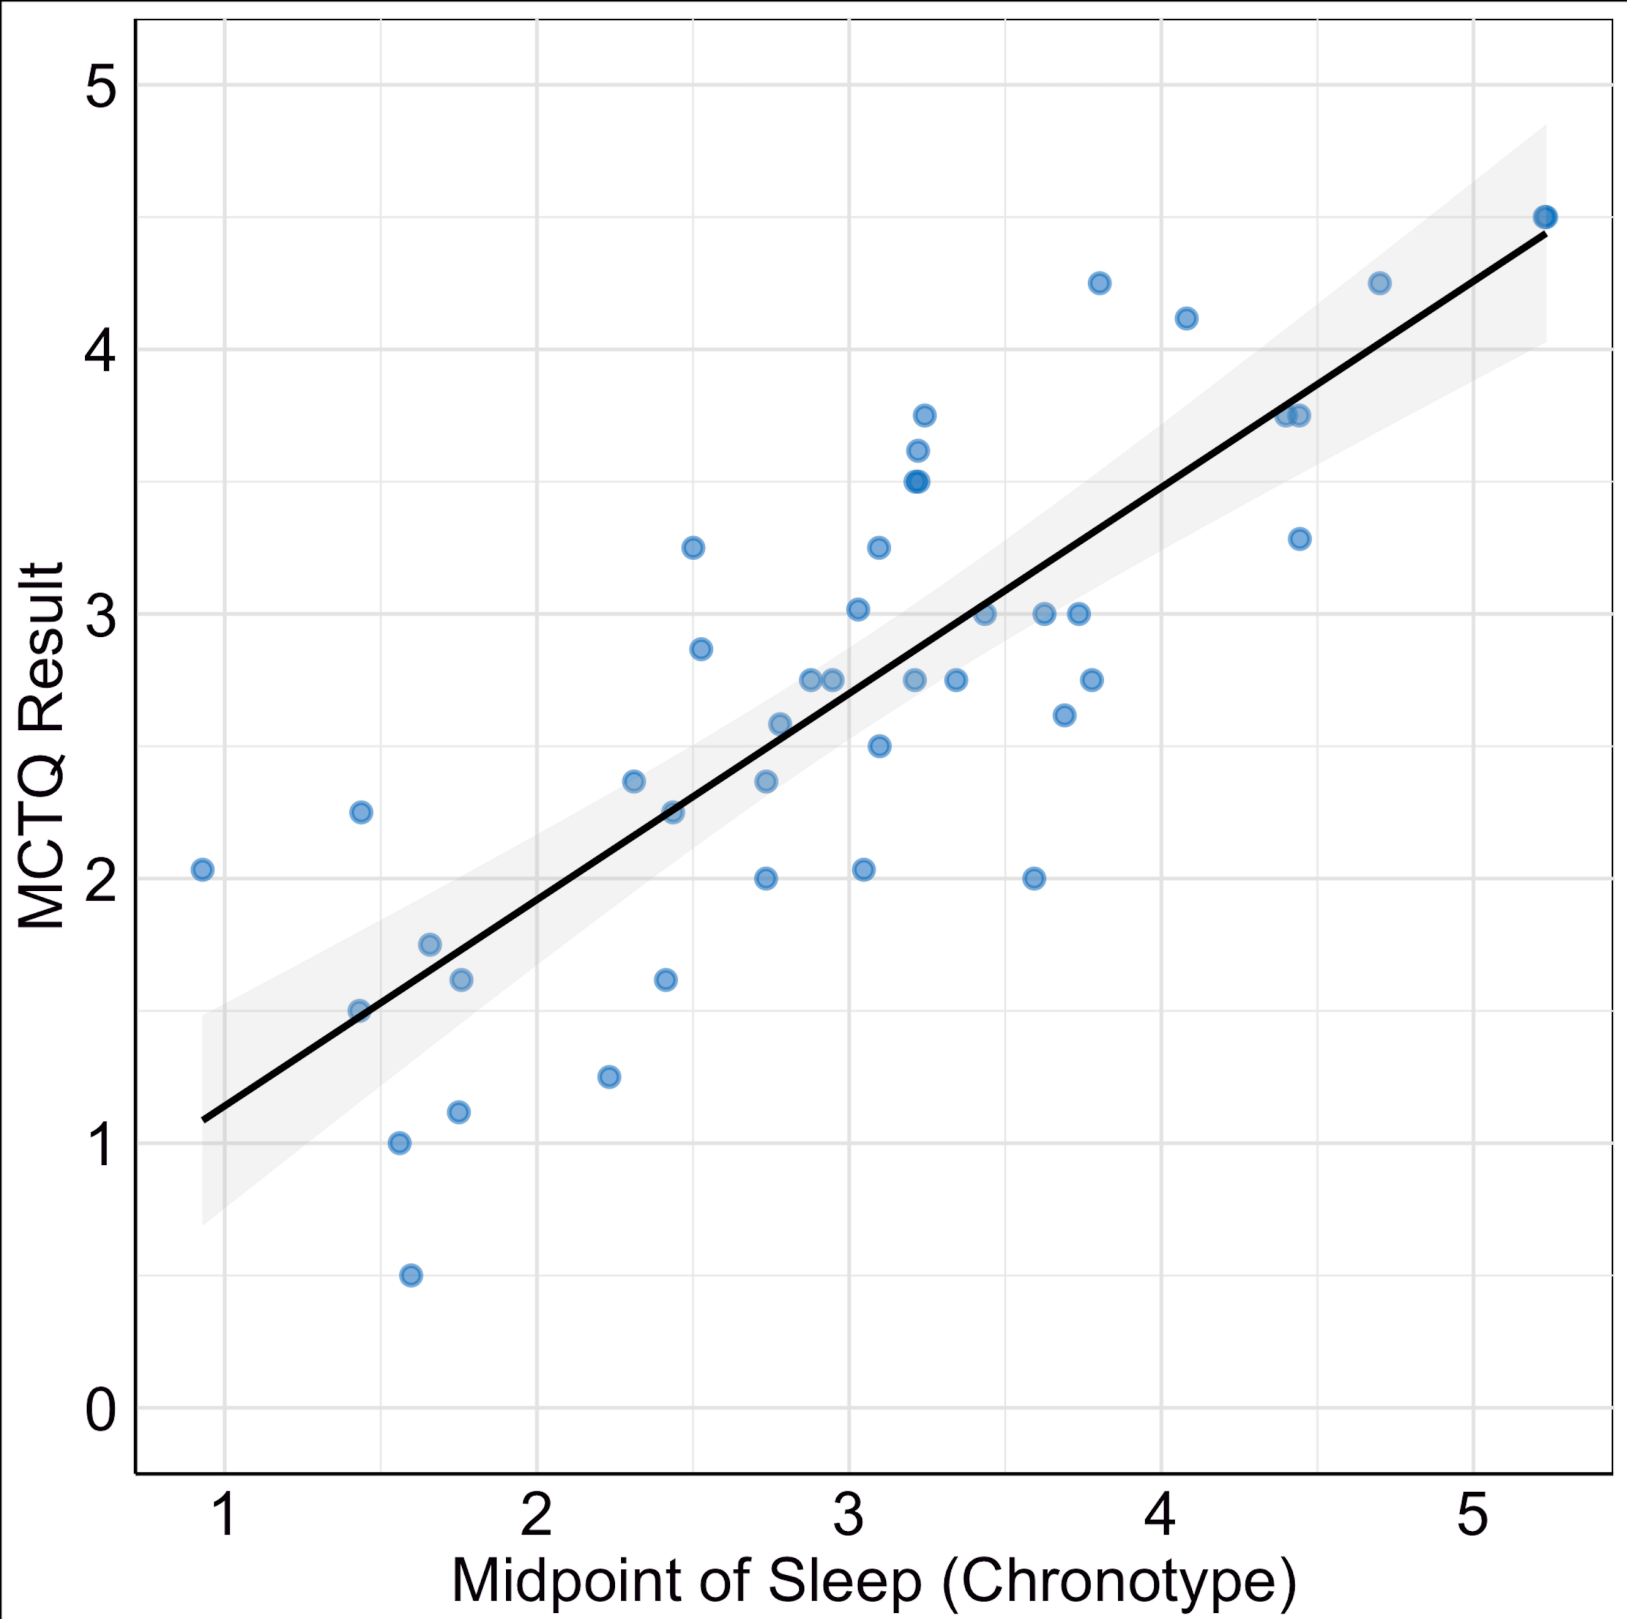

Supplement: media-1.pdf [file media-1.pdf]
